# Supplementary material for: Isoprenoids increase bovine endometrial stromal cell tolerance to the cholesterol-dependent cytolysin from Trueperella pyogenes
Source: PubMed Central journal article supplement (PMC6203874; doi:10.1093/biolre/ioy099), 2018-04-24
Supplement: ioy099_supp.pdf [file ioy099_supp.pdf]

## **Supplemental Data**

### **Isoprenoids increase bovine endometrial stromal cell tolerance to the cholesterol-dependent cytolyisin from *Trueperella pyogenes***

Sholeem Griffin<sup>1</sup> Gareth D. Healey<sup>1</sup>, I. Martin Sheldon<sup>1</sup>

<sup>1</sup> Swansea University Medical School, Swansea University, Swansea, United Kingdom

**Supplemental Table S1.** siRNA sequence for target gene knockdown.

**Supplemental Table S2.** Sequence of reference gene and target gene primers.

**Supplemental Table S3.** Details of the antibodies used in the study for Western blotting.

**Supplemental Figure S1.** Western blot for ABCA1.

**Supplemental Table S1.** siRNA sequence for target gene knockdown.

| <b>Gene</b>  | <b>Direction</b> | <b>Sequence (5'→ 3')</b> |
|--------------|------------------|--------------------------|
| <i>FDPS</i>  | Sense            | GCACAGACAUCCAGGACAAUU    |
|              | Antisense        | UUGUCCUGGAUGUCUGUGCUU    |
| <i>GGPS1</i> | Sense            | UGACAGAAAUGUUGCAUAAUU    |
|              | Antisense        | UUAUGCAACAUUUCUGUCAUU    |
| <i>NR1H2</i> | Sense            | AGGUGAAGGUGUCCAGUUAUU    |
|              | Antisense        | UAACUGGACACCUUCACCU      |
| <i>NR1H3</i> | Sense            | GCUAAAUGAUGCUGAGUUUUU    |
|              | Antisense        | AAACUCAGCAUCAUUUAGC      |

**Supplemental Table S2.** Sequence of reference gene and target gene primers.

| <b>Gene</b>  | <b>Direction</b> | <b>Sequence (5' → 3')</b> |
|--------------|------------------|---------------------------|
| <i>ACTB</i>  | Forward          | CAGAAGGACTCGTACGTGGG      |
|              | Reverse          | TTGGCCTTGGGGTTCAGGG       |
| <i>RLP19</i> | Forward          | TGTTTTTCCGGCATCGAGCCCG    |
|              | Reverse          | ATGCCAACTCCCGCCAGCAGAT    |
| <i>FDPS</i>  | Forward          | ATGACGGGTAAGATCGGCAC      |
|              | Reverse          | TTCTGCCCATAGTTCTCCTGC     |
| <i>GGPS1</i> | Forward          | TATGACCCCTGCCTTCCTGA      |
|              | Reverse          | TGGTTCTCACTTGTTTACCTGG    |
| <i>FDFT1</i> | Forward          | GGCACCCCTGAGGAGTTCTAC     |
|              | Reverse          | GCATACTGCATGGCGCATTT      |
| <i>NR1H2</i> | Forward          | TCTTCACCTGGGGGAAAGGA      |
|              | Reverse          | CTAGGATGACCACAACGGAGG     |
| <i>NR1H3</i> | Forward          | GGAGGTACAACCCTGGGAGT      |
|              | Reverse          | AGCAATGAGCAAGGCAAACCT     |

**Supplemental Table S3.** Details of the antibodies used in the study for Western blotting.

| <b>Protein target</b> | <b>Antigen sequence</b>                                                                          | <b>Name of antibody</b>                                          | <b>Manufacturer, catalog #, and RRID</b>                         | <b>Species raised in</b>                         | <b>Dilution used</b> |
|-----------------------|--------------------------------------------------------------------------------------------------|------------------------------------------------------------------|------------------------------------------------------------------|--------------------------------------------------|----------------------|
| <b>ABCA1</b>          | Recombinant fragment corresponding to Human ABCA1 aa 1800-2260 in UniProtKB O95477 (ABCA1_HUMAN) | Mouse Anti-ABCA1 Monoclonal Antibody, Unconjugated, Clone AB.H10 | Abcam, Cambridge, UK<br>Abcam Cat# ab18180,<br>RRID:AB_444302    | Mouse monoclonal IgG1<br>Clone:<br>mAbcam AB.H10 | 1:500                |
| <b>ACTB</b>           | Synthetic peptide conjugated to KLH derived from within residues 1-100 of human beta Actin       | Anti-beta Actin [mAbcam 8226] antibody ab8226                    | Abcam PLC, Cambridge, UK<br>Abcam Cat# ab8226,<br>RRID:AB_306371 | Mouse monoclonal IgG1<br>Clone:<br>mAbcam 8226   | 1:500                |

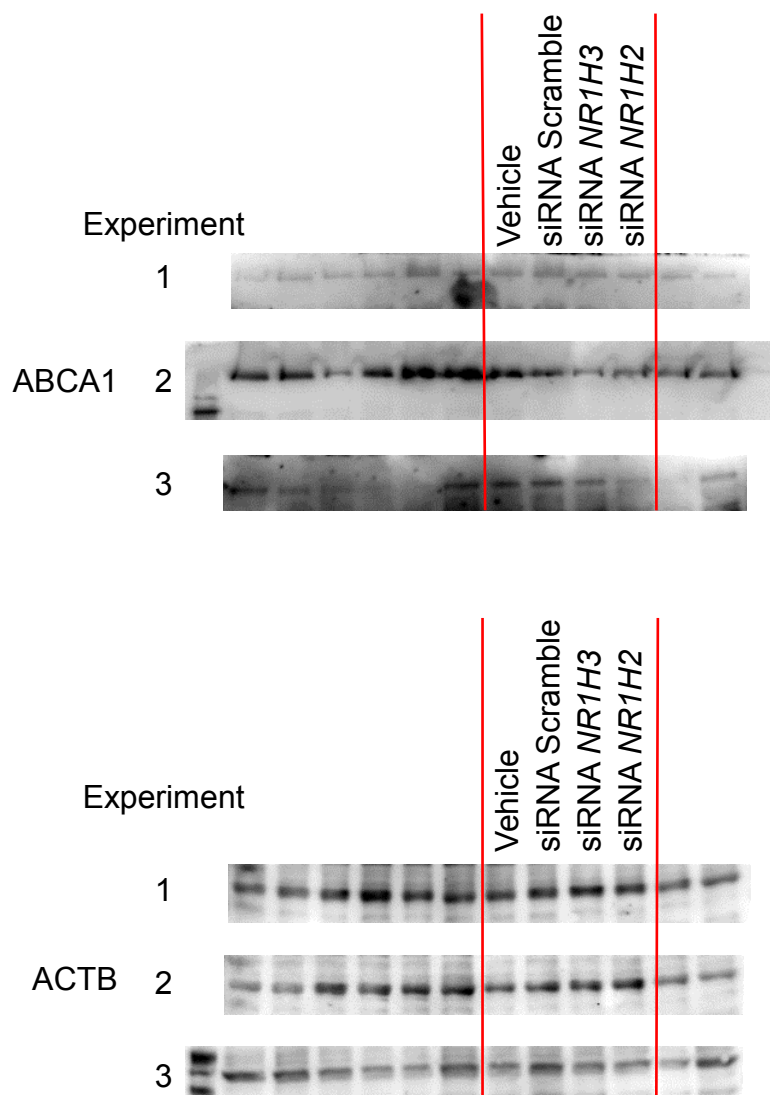

**Supplemental Figure S1.** Western blot for ABCA1. Endometrial stromal cells cultured with vehicle or transfected with scrambled siRNA, or siRNA targeting NR1H3 (siNR1H3) or NR1H2 (siNR1H2), were analysed by Western blot for ABCA1 and ACTB abundance. The images of the blots for ABCA1 and ACTB are presented for the three independent experiments.
